# Supplementary material for: Metabolic and transcriptional profiling reveals pyruvate dehydrogenase kinase 4 as a mediator of epithelial-mesenchymal transition and drug resistance in tumor cells
Source: PubMed Central journal article supplement (PMC4221711; doi:10.1186/2049-3002-2-20), 2014-11-03

**Figure S4**

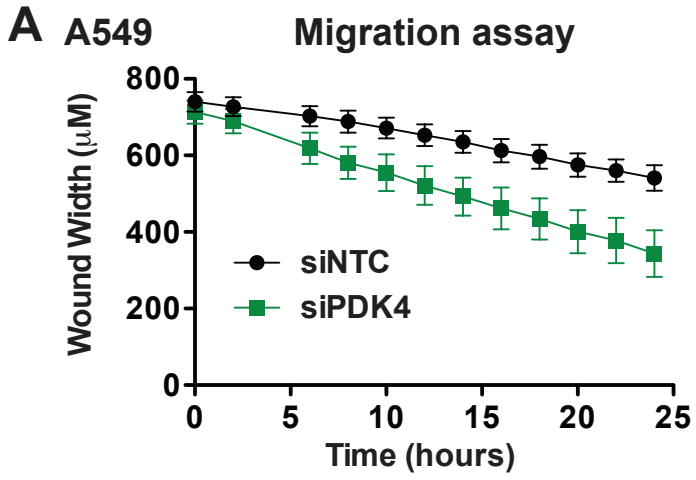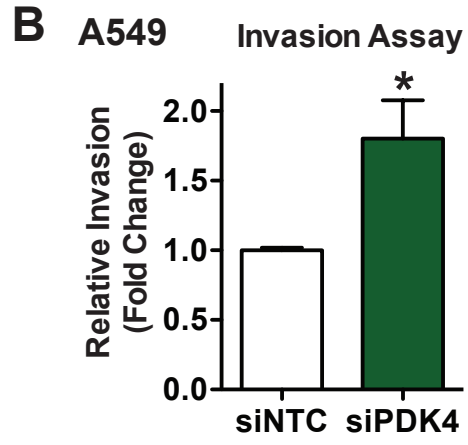

Supplement: 40170_2014_136_MOESM6_ESM.pdf [file 40170_2014_136_MOESM6_ESM.pdf]
